# Supplementary material for: Dipeptidyl peptidase-4 inhibitors and fracture risk: an updated meta-analysis of randomized clinical trials
Source: PubMed Central journal article supplement (PMC4935882; doi:10.1038/srep29104), 2016-07-07
Supplement: srep29104-s1.pdf [file srep29104-s1.pdf]

# **Dipeptidyl peptidase-4 inhibitors and fracture risk: an updated meta-analysis of randomized clinical trials**

Jiaying Fu<sup>1\*</sup>, Jianhong Zhu<sup>2\*</sup>, Yehua Hao<sup>1</sup>, Chongchong Guo<sup>1</sup> and Zhikun Zhou<sup>1</sup>

Jiaying, Fu, Guangdong Medical University, 523808, [404978306@qq.com](mailto:404978306@qq.com).

Jianhong, Zhu, Sun Yat-Sen Memorial Hospital, Guangzhou, 510120, [645582117@qq.com](mailto:645582117@qq.com).

Yehua, Hao, Guangdong Medical University, 523808, [1528735424@qq.com](mailto:1528735424@qq.com).

Chongchong, Guo, Guangdong Medical University, 523808, [942826128@qq.com](mailto:942826128@qq.com).

Zhikun, Zhou, Guangdong Medical University, 523808, [zhouzhkun@126.com](mailto:zhouzhkun@126.com),  
18928033088, 0756-2656022.

Supplementary figure 1. Funnel plot for publication bias

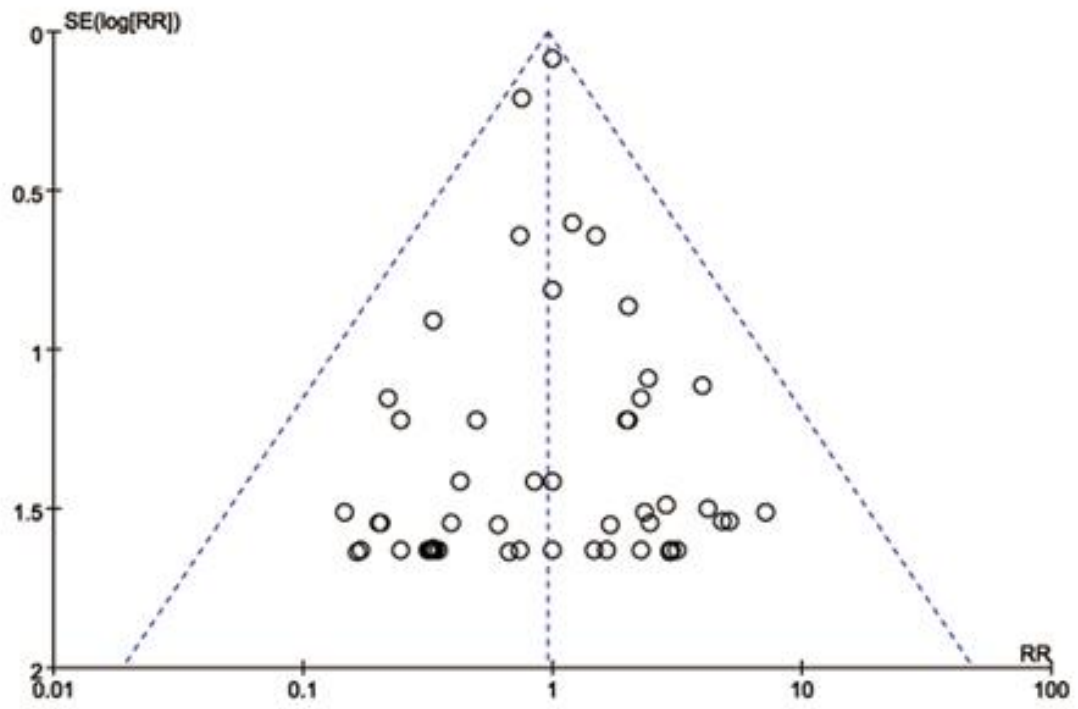

Supplemental table 1. Quality assessment of the included studies

| Study          | NCT code    | Description of Randomization | Description of Allocation | Description of Blinding | Reporting of Drop out | Intention to treat |
|----------------|-------------|------------------------------|---------------------------|-------------------------|-----------------------|--------------------|
| Alogliptin     |             |                              |                           |                         |                       |                    |
| Bosi 2011      | NCT00432276 | NA                           | Y                         | Y                       | Y                     | Y                  |
| NCT00286468    | NCT00286468 | NA                           | NA                        | Y                       | Y                     | Y                  |
| NCT01023581    | NCT01023581 | NA                           | NA                        | Y                       | Y                     | Y                  |
| NCT00856284    | NCT00856284 | NA                           | NA                        | Y                       | Y                     | Y                  |
| NCT00328627    | NCT00328627 | NA                           | NA                        | Y                       | Y                     | Y                  |
| NCT00707993    | NCT00707993 | NA                           | NA                        | Y                       | Y                     | Y                  |
| White 2013     | NCT00968708 | Y                            | Y                         | Y                       | Y                     | Y                  |
| NCT01183013    | NCT01183013 | NA                           | NA                        | Y                       | Y                     | Y                  |
| NCT00915772    | NCT00915772 | NA                           | NA                        | Y                       | Y                     | Y                  |
| NCT00798161    | NCT00798161 | NA                           | NA                        | Y                       | Y                     | Y                  |
| NCT01438814    | NCT01438814 | NA                           | NA                        | Y                       | Y                     | Y                  |
| NCT00601250    | NCT00601250 | NA                           | NA                        | Y                       | Y                     | Y                  |
| NCT01084005    | NCT01084005 | NA                           | NA                        | Y                       | Y                     | Y                  |
| NCT00954447    | NCT00954447 | NA                           | NA                        | Y                       | Y                     | Y                  |
| NCT00602472    | NCT00602472 | NA                           | NA                        | Y                       | Y                     | Y                  |
| NCT00800683    | NCT00800683 | NA                           | NA                        | Y                       | Y                     | Y                  |
| NCT00621140    | NCT00621140 | NA                           | NA                        | Y                       | Y                     | Y                  |
| NCT01204294    | NCT01204294 | NA                           | NA                        | N                       | N                     | Y                  |
| NCT01215097    | NCT01215097 | NA                           | NA                        | Y                       | Y                     | Y                  |
| Barnett 2013   | NCT01084005 | Y                            | Y                         | Y                       | Y                     | Y                  |
| Saxagliptin    |             |                              |                           |                         |                       |                    |
| Barnett 2012   | NCT00757588 | Y                            | Y                         | Y                       | Y                     | Y                  |
| Hollander 2011 | NCT00295633 | NA                           | Y                         | Y                       | Y                     | Y                  |
| Scirica 2013   | NCT01107886 | Y                            | Y                         | Y                       | Y                     | Y                  |
| NCT01006603    | NCT01006603 | NA                           | NA                        | Y                       | Y                     | Y                  |
| NCT00121667    | NCT00121667 | NA                           | NA                        | Y                       | Y                     | Y                  |
| NCT00575588    | NCT00575588 | NA                           | NA                        | Y                       | Y                     | Y                  |
| NCT00614939    | NCT00614939 | NA                           | NA                        | Y                       | Y                     | Y                  |
| NCT00327015    | NCT00327015 | NA                           | NA                        | Y                       | Y                     | Y                  |
| NCT00661362    | NCT00661362 | NA                           | NA                        | Y                       | Y                     | Y                  |
| Sitagliptin    |             |                              |                           |                         |                       |                    |
| NCT00509236    | NCT00509236 | NA                           | NA                        | Y                       | Y                     | Y                  |
| NCT01076088    | NCT01076088 | NA                           | NA                        | Y                       | Y                     | Y                  |
| NCT00509262    | NCT00509262 | NA                           | NA                        | Y                       | Y                     | Y                  |
| NCT01076075    | NCT01076075 | NA                           | NA                        | Y                       | Y                     | Y                  |
| NCT00885352    | NCT00885352 | NA                           | NA                        | Y                       | Y                     | Y                  |
| NCT00395343    | NCT00395343 | NA                           | NA                        | Y                       | Y                     | Y                  |
| NCT00722371    | NCT00722371 | NA                           | NA                        | Y                       | Y                     | Y                  |

|              |             |    |    |   |   |   |
|--------------|-------------|----|----|---|---|---|
| NCT01462266  | NCT01462266 | NA | NA | Y | Y | Y |
| NCT00305604  | NCT00305604 | NA | NA | Y | Y | Y |
| NCT00411554  | NCT00411554 | NA | NA | Y | Y | Y |
| NCT00103857  | NCT00103857 | NA | NA | Y | Y | Y |
| NCT01177813  | NCT01177813 | NA | NA | Y | Y | Y |
| NCT00449930  | NCT00449930 | NA | NA | Y | Y | Y |
| NCT00701090  | NCT00701090 | NA | NA | Y | Y | Y |
| NCT00086515  | NCT00086515 | NA | NA | Y | Y | Y |
| NCT01098539  | NCT01098539 | NA | NA | Y | Y | Y |
| NCT00086502  | NCT00086502 | NA | NA | Y | Y | Y |
| NCT00094770  | NCT00094770 | NA | NA | Y | Y | Y |
| NCT01289990  | NCT01289990 | NA | NA | Y | Y | Y |
| NCT00482729  | NCT00482729 | NA | NA | Y | Y | Y |
| NCT00397631  | NCT00397631 | NA | NA | Y | Y | Y |
| NCT01106677  | NCT01106677 | NA | NA | Y | Y | Y |
| NCT01137812  | NCT01137812 | NA | NA | Y | Y | Y |
| NCT01106690  | NCT01106690 | NA | NA | Y | Y | Y |
| NCT00881530  | NCT00881530 | NA | NA | Y | Y | Y |
| Iwamoto 2010 |             | Y  | Y  | Y | Y | Y |
| Raz 2008     | NCT00337610 | Y  | Y  | Y | Y | Y |
| Vildagliptin |             |    |    |   |   |   |
| Bosi 2009    | NCT00468039 | NA | Y  | Y | Y | Y |
|              | NCT00382096 |    |    |   |   |   |
| Fonseca 2007 | NCT00099931 | NA | Y  | Y | Y | Y |
| Iwamoto 2010 |             | NA | Y  | Y | Y | Y |
| Pan 2012     |             | NA | Y  | Y | Y | Y |
| Scherbaum    | NCT00101712 | NA | Y  | Y | Y | Y |
| 2008         |             |    |    |   |   |   |
| Yang 2015    |             | NA | Y  | Y | Y | Y |

---

NA, Not Adequately described; Y, yes; N, no

Supplementary table 2. the Grading of Recommendations Assessment, Development and Evaluation.

| GRADE evidence profile: evaluating DPP-4 inhibitors versus placebo or other anti-diabetic medications in patients with type 2 diabetes |              |               |              |             |                  |                             |                          |                                           |
|----------------------------------------------------------------------------------------------------------------------------------------|--------------|---------------|--------------|-------------|------------------|-----------------------------|--------------------------|-------------------------------------------|
| Participants (studies)                                                                                                                 | Risk of bias | Inconsistency | Indirectness | Imprecision | Publication bias | Overall quality of evidence | Relative effect (95% CI) | Anticipated absolute effects              |
| All fracture                                                                                                                           |              |               |              |             |                  |                             |                          |                                           |
| 62206 (62 studies)                                                                                                                     | Serious      | No serious    | No serious   | No serious  | Undetected       | Moderate                    | RR 0.95 (0.83 to 1.1)    | 1 fewer per 1000 (from 2 fewer to 1 more) |
| Drug                                                                                                                                   |              |               |              |             |                  |                             |                          |                                           |
| 62206 (62 studies)                                                                                                                     | Serious      | No serious    | No serious   | No serious  | Undetected       | Moderate                    | RR 0.95 (0.82 to 1.1)    | 1 fewer per 1000 (from 2 fewer to 1 more) |
| Drug - Alogliptin                                                                                                                      |              |               |              |             |                  |                             |                          |                                           |
| 12085 (13 studies)                                                                                                                     | Serious      | No serious    | No serious   | No serious  | Undetected       | Moderate                    | RR 0.79 (0.55 to 1.14)   | 3 fewer per 1000 (from 5 fewer to 2 more) |
| Drug - Linagliptin                                                                                                                     |              |               |              |             |                  |                             |                          |                                           |
| 7638 (13 studies)                                                                                                                      | Serious      | No serious    | No serious   | No serious  | Undetected       | Moderate                    | RR 1.19 (0.6 to 2.38)    | 1 more per 1000 (from 1 fewer to 5 more)  |
| Drug - saxagliptin                                                                                                                     |              |               |              |             |                  |                             |                          |                                           |
| 21877 (9 studies)                                                                                                                      | Serious      | No serious    | No serious   | No serious  | Undetected       | Moderate                    | RR 1.02 (0.86 to 1.21)   | 0 more per 1000 (from 3 fewer to 5 more)  |
| Drug - Sitagliptin                                                                                                                     |              |               |              |             |                  |                             |                          |                                           |
| 17907 (27 studies)                                                                                                                     | Serious      | No serious    | No serious   | No serious  | Undetected       | Moderate                    | RR 0.67 (0.39 to 1.15)   | 1 fewer per 1000 (from 2 fewer to 1 more) |
| Drug - anagliptin                                                                                                                      |              |               |              |             |                  |                             |                          |                                           |
| 108 (1 study)                                                                                                                          | Serious      | No serious    | No serious   | No serious  | Undetected       | Moderate                    | RR 4.16 (0.22 to 78.51)  | 0 per 1000                                |
| Drug - Vildagliptin                                                                                                                    |              |               |              |             |                  |                             |                          |                                           |
| 2591 (5 studies)                                                                                                                       | Serious      | No serious    | No serious   | No serious  | Undetected       | Moderate                    | RR 0.5 (0.12 to 2.05)    | 2 fewer per 1000 (from 4 fewer to 5 more) |
| Control                                                                                                                                |              |               |              |             |                  |                             |                          |                                           |
| 64726 (62 studies)                                                                                                                     | Serious      | No serious    | No serious   | No serious  | Undetected       | Moderate                    | RR 0.94 (0.82 to 1.09)   | 1 fewer per 1000 (from 2 fewer to 1 more) |
| Control - ACTIVE                                                                                                                       |              |               |              |             |                  |                             |                          |                                           |
| 16773 (28 studies)                                                                                                                     | Serious      | No serious    | No serious   | No serious  | Undetected       | Moderate                    | RR 0.91 (0.54 to 1.52)   | 0 fewer per 1000 (from 2 fewer to 2 more) |
| Control - PBO                                                                                                                          |              |               |              |             |                  |                             |                          |                                           |

|                            |         |            |            |            |            |          |                           |                                              |
|----------------------------|---------|------------|------------|------------|------------|----------|---------------------------|----------------------------------------------|
| 47953<br>(43 studies)      | Serious | No serious | No serious | No serious | Undetected | Moderate | RR 0.95<br>(0.81 to 1.1)  | 1 fewer per 1000<br>(from 3 fewer to 2 more) |
| DURATION                   |         |            |            |            |            |          |                           |                                              |
| 62206<br>(62 studies)      | Serious | No serious | No serious | No serious | Undetected | Moderate | RR 0.95<br>(0.82 to 1.1)  | 1 fewer per 1000<br>(from 2 fewer to 1 more) |
| DURATION - $\geq$ 52 weeks |         |            |            |            |            |          |                           |                                              |
| 41641<br>(28 studies)      | Serious | No serious | No serious | No serious | Undetected | Moderate | RR 0.97<br>(0.83 to 1.13) | 0 fewer per 1000<br>(from 3 fewer to 2 more) |
| DURATION - < 52 weeks      |         |            |            |            |            |          |                           |                                              |
| 20565<br>(34 studies)      | Serious | No serious | No serious | No serious | Undetected | Moderate | RR 0.76<br>(0.46 to 1.27) | 1 fewer per 1000<br>(from 2 fewer to 1 more) |

Supplemental table 3. Fracture events by locations

| Location of fracture   | Events of fracture |         |
|------------------------|--------------------|---------|
|                        | DPP4               | Control |
| Lower limb fracture    | 122                | 108     |
| Foot                   | 18                 | 16      |
| Femur                  | 21                 | 21      |
| Ankle                  | 15                 | 21      |
| Tibia                  | 8                  | 9       |
| Femoral neck           | 14                 | 8       |
| Fibula                 | 6                  | 6       |
| Humerus                | 13                 | 9       |
| Hip                    | 12                 | 12      |
| Patella                | 9                  | 4       |
| Ischium                | 2                  | 0       |
| Pelvic                 | 3                  | 1       |
| Acetabulum             | 1                  | 1       |
| Upper limb fracture    | 43                 | 41      |
| Hand                   | 8                  | 10      |
| Radius                 | 8                  | 12      |
| Wrist                  | 11                 | 6       |
| Ulna                   | 4                  | 1       |
| Forearm                | 1                  | 2       |
| Scapula                | 1                  | 1       |
| Clavicle               | 2                  | 1       |
| Unspecified upper limb | 8                  | 8       |
| Spine fracture         | 16                 | 23      |
| Spinal compression     | 6                  | 8       |
| Pubis                  | 3                  | 5       |
| Lumbar vertebral       | 5                  | 6       |
| Cervical vertebral     | 0                  | 3       |
| Chest fracture         | 16                 | 17      |
| Rib                    | 11                 | 13      |
| Sternal                | 1                  | 3       |
| Thoracic               | 4                  | 1       |
| Face                   | 4                  | 4       |
| Facial bones           | 4                  | 4       |
| Unspecified fracture   | 160                | 165     |
